# Supplementary material for: Fluorescence probes based on AIE luminogen: application for sensing Hg2+ in aqueous media and cellular imaging
Source: Royal Society of Chemistry journal article supplement (doi:10.1039/c8nj02245c), 2018-01-01
Supplement: c8nj02245c1.pdf [file c8nj02245c1.pdf]

## Supporting Information

### Fluorescence probes based on AIE luminogen: application to sensing Hg<sup>2+</sup> in aqueous media and cellular imaging

Kai Wang <sup>a&</sup>, Jiajun Li <sup>b&</sup>, Shaomin Ji <sup>a\*</sup>, Lujun Li <sup>a</sup>, Zhipeng Qiu <sup>a</sup>, Chengqiang Pan <sup>a</sup>, Jianye Zhang <sup>b\*</sup>, Yanping Huo <sup>a, c\*</sup>

<sup>a</sup> *School of Chemical Engineering and Light Industry, Guangdong University of Technology, Guangzhou 510006, China*

<sup>b</sup> *Key Laboratory of Molecular Target & Clinical Pharmacology, School of Pharmaceutical Sciences & the Fifth Affiliated Hospital, Guangzhou Medical University, Guangzhou 511436, China*

<sup>c</sup> *Guangdong Engineering Research Center for Scientific Research and Biochemical Detection reagent, Guangzhou 510006, China*

<sup>&</sup> *These authors contributed equally to this work and should be considered co-first authors*

*\*Corresponding authors. Tel.: +86 20 39322236; Fax: +86 20 39322235; Mobile: +86 13798135622. E-mail addresses: [yphuo@gdut.edu.cn](mailto:yphuo@gdut.edu.cn), [organichteacherhuo@126.com](mailto:organichteacherhuo@126.com) (Y. Huo), [jianyez@163.com](mailto:jianyez@163.com) (J. Zhang), [smji@gdut.edu.cn](mailto:smji@gdut.edu.cn) (S. Ji).*

**Fig. S1.** <sup>1</sup>H-NMR spectrum of TPE1

**Fig. S2.** <sup>13</sup>C-NMR spectrum of TPE1

**Fig. S3.** <sup>1</sup>H-NMR spectrum of S1

**Fig. S4.** <sup>13</sup>C-NMR spectrum of S1

**Fig. S5.** <sup>1</sup>H-NMR spectrum of a

**Fig. S6.** <sup>13</sup>C-NMR spectrum of a

**Fig. S7.** <sup>1</sup>H-NMR spectrum of b

**Fig. S8.** <sup>13</sup>C-NMR spectrum of b

**Fig. S9.** <sup>1</sup>H-NMR spectrum of TPE2

**Fig. S10.** <sup>13</sup>C-NMR spectrum of TPE2

**Fig. S11.** <sup>1</sup>H-NMR spectrum of S2

**Fig. S12.** <sup>13</sup>C-NMR spectrum of S2

**Fig. S13.** HR-MS spectrum of S1

**Fig. S14.** HR-MS spectrum of S2

**Fig. S15.** UV-vis absorption of probe S1 and S2 in THF solution

**Fig. S16.** Particle size of aggregates of (a) S1 (1 × 10<sup>-5</sup> M) and (b) S2 (1 × 10<sup>-5</sup> M) formed in THF

aqueous solution ( $f_w = 99$  vol %).

**Fig. S17.** TEM image of (a) **S1** and (b) **S2** particles.

**Fig. S18.** Percentage of A-549 cell viability remaining after cell treatment with (a) **S1** and (b) **S2**.

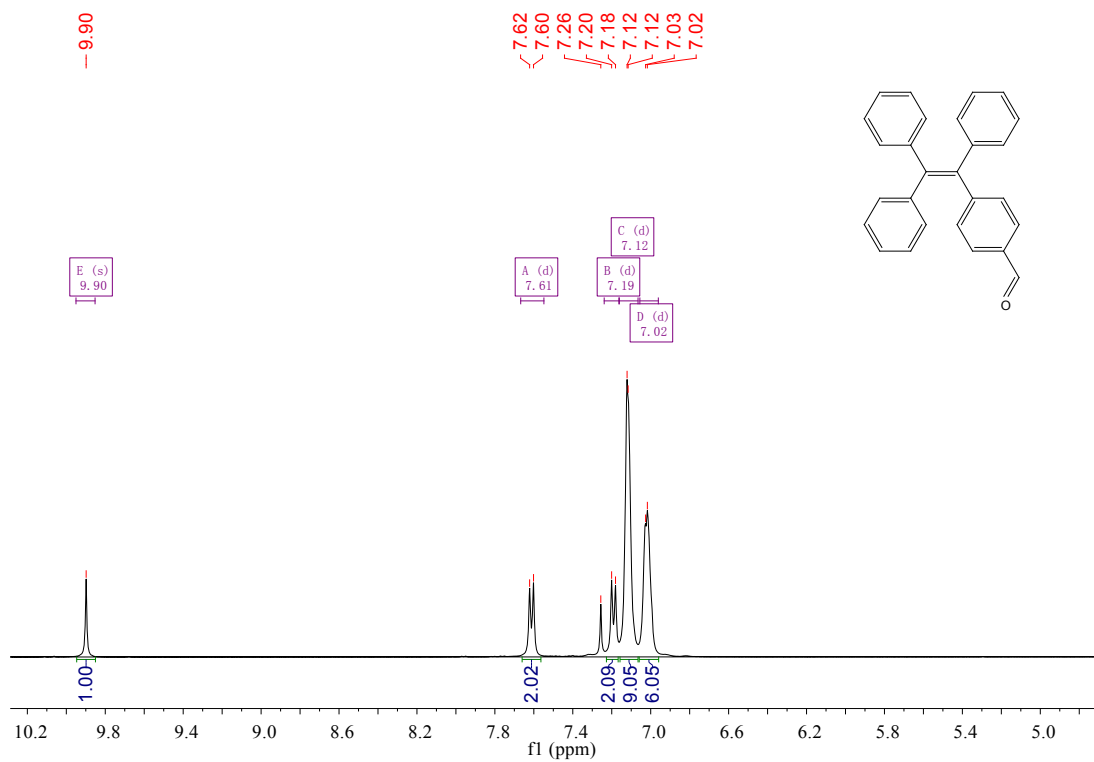

Fig. S1.  $^1\text{H}$ -NMR spectrum of TPE1

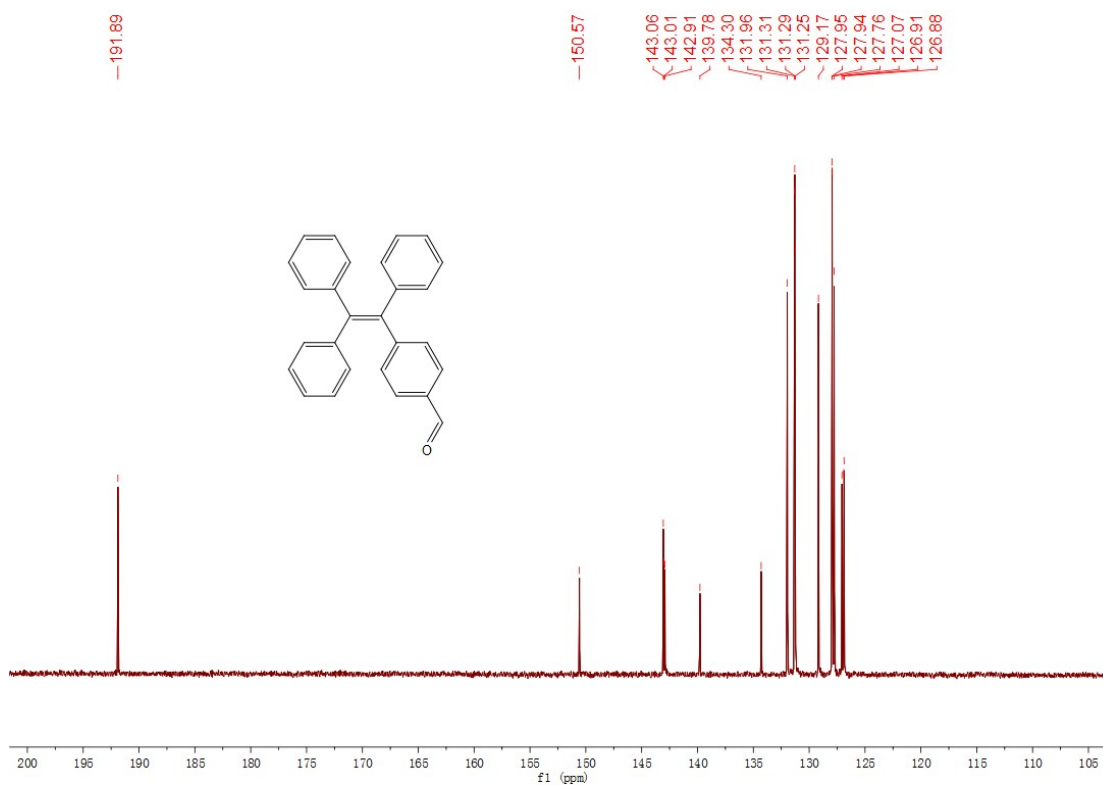

Fig. S2.  $^{13}\text{C}$ -NMR spectrum of TPE1

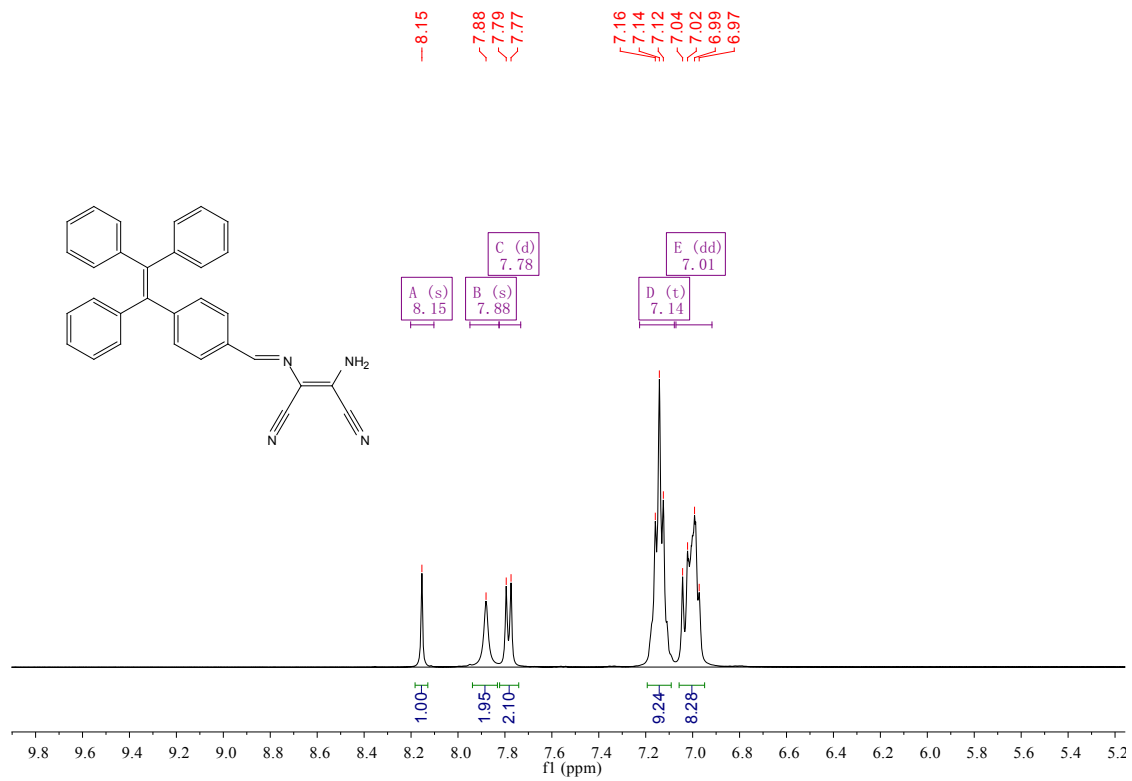

Fig. S3. <sup>1</sup>H-NMR spectrum of S1.

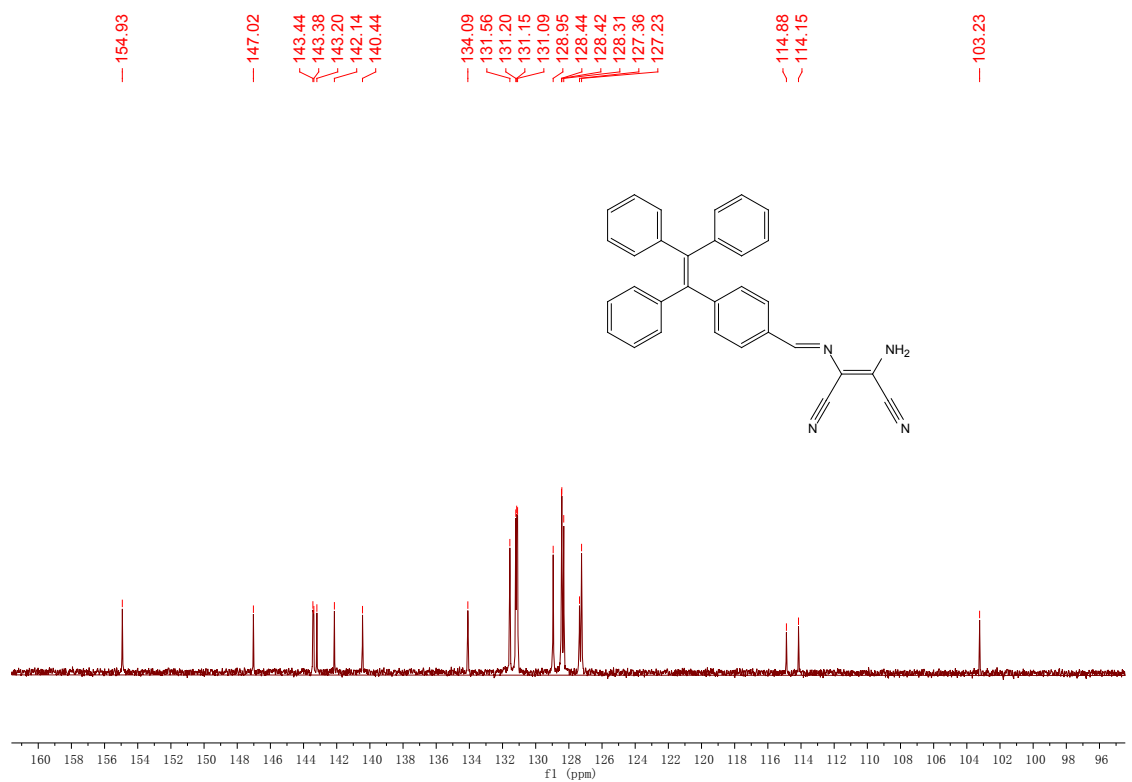

Fig. S4.  $^{13}\text{C}$ -NMR spectrum of S1.

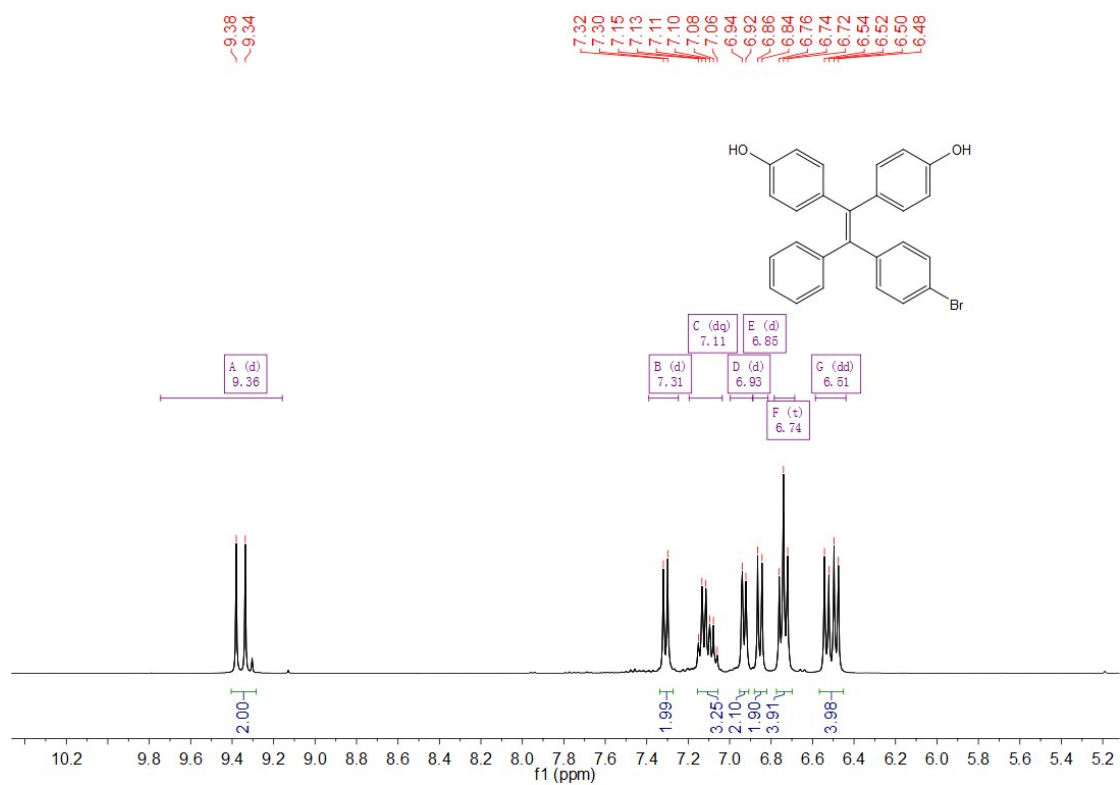

Fig. S5.  $^1\text{H}$ -NMR spectrum of a

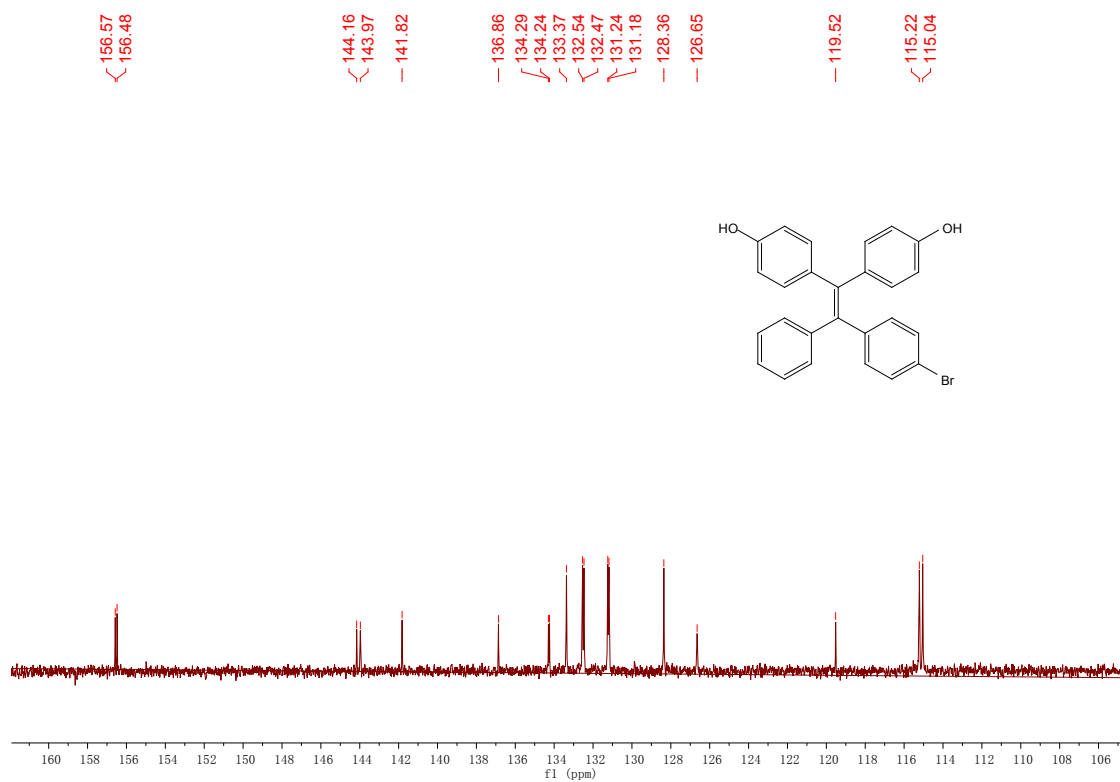

Fig. S6.  $^{13}\text{C}$ -NMR spectrum of **a**

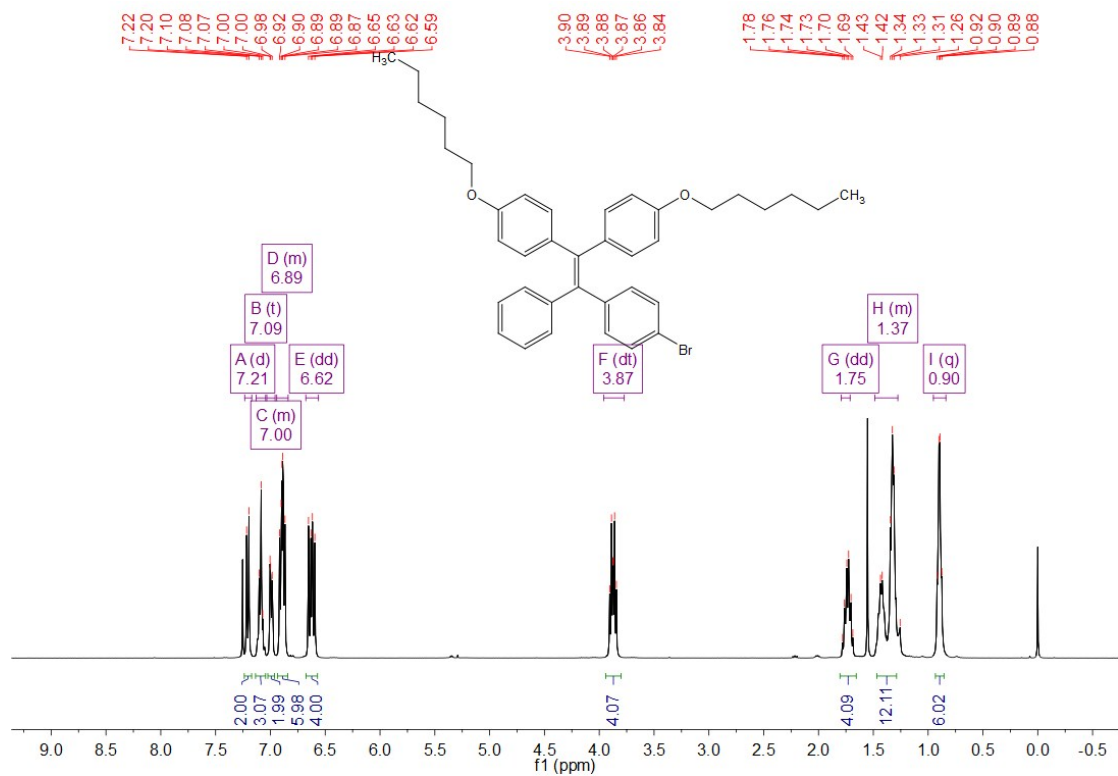

Fig. S7.  $^1\text{H}$ -NMR spectrum of **b**

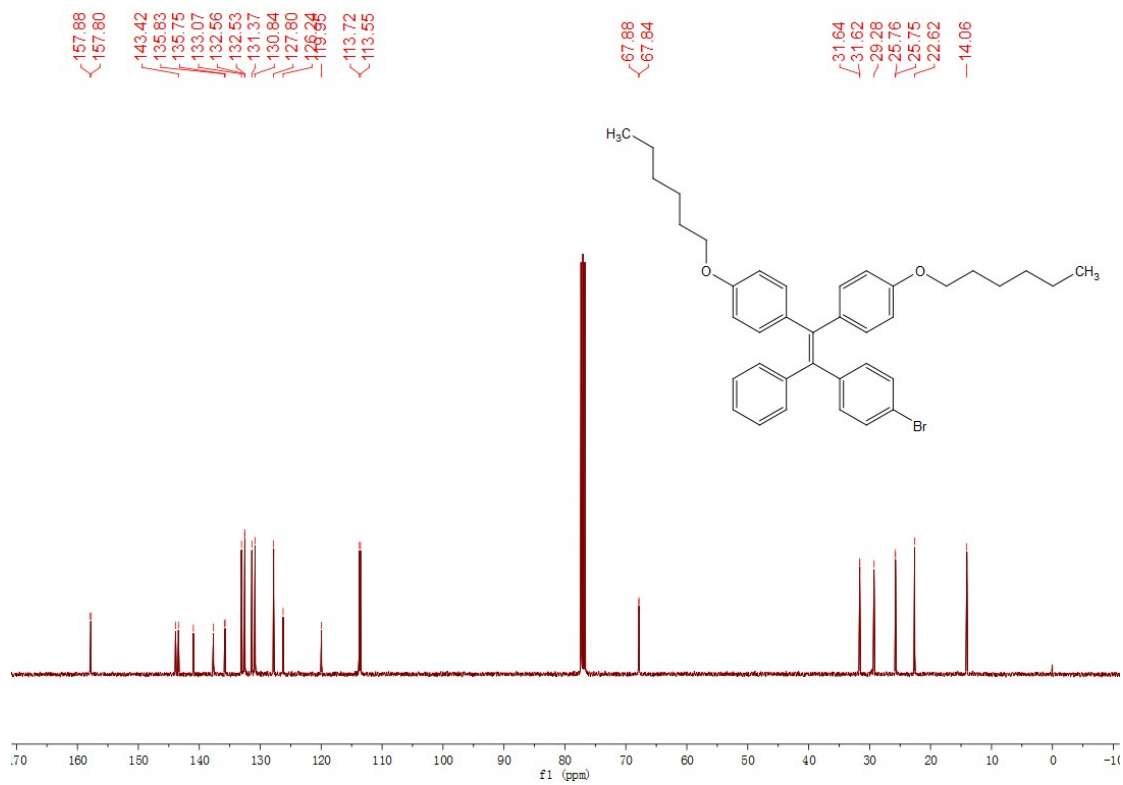

Fig. S8.  $^{13}\text{C}$ -NMR spectrum of **b**

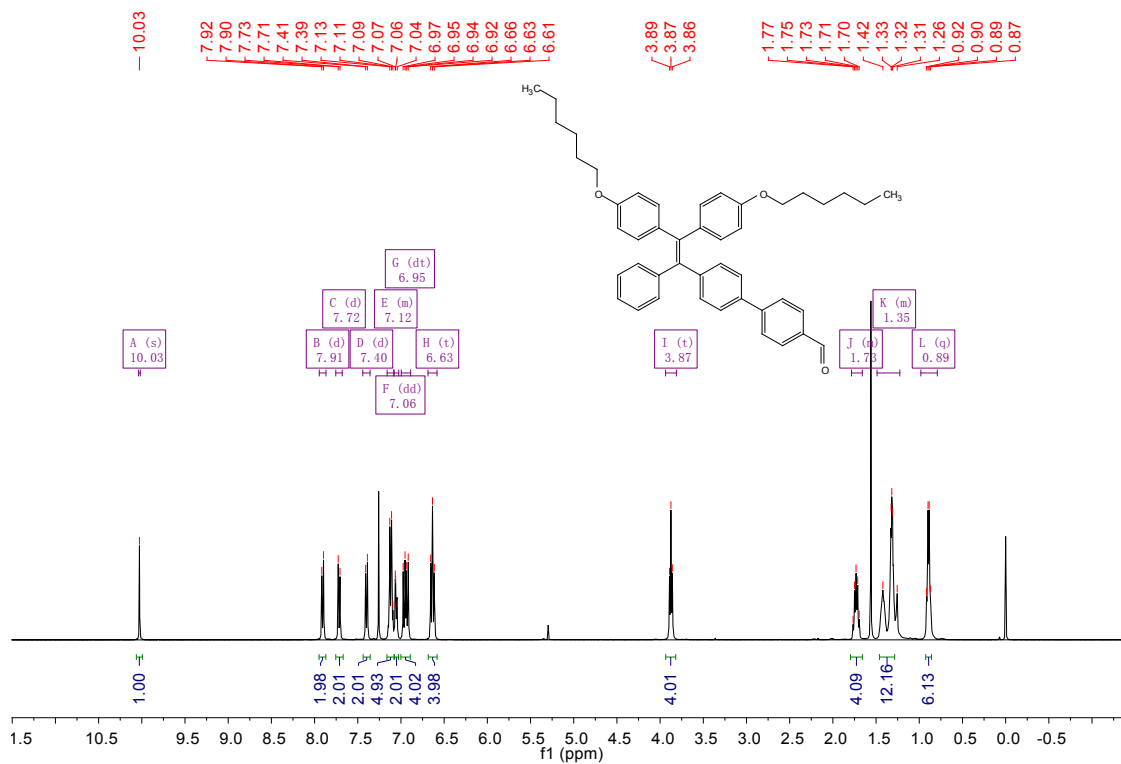

**Fig. S9.**  $^1\text{H-NMR}$  spectrum of TPE2

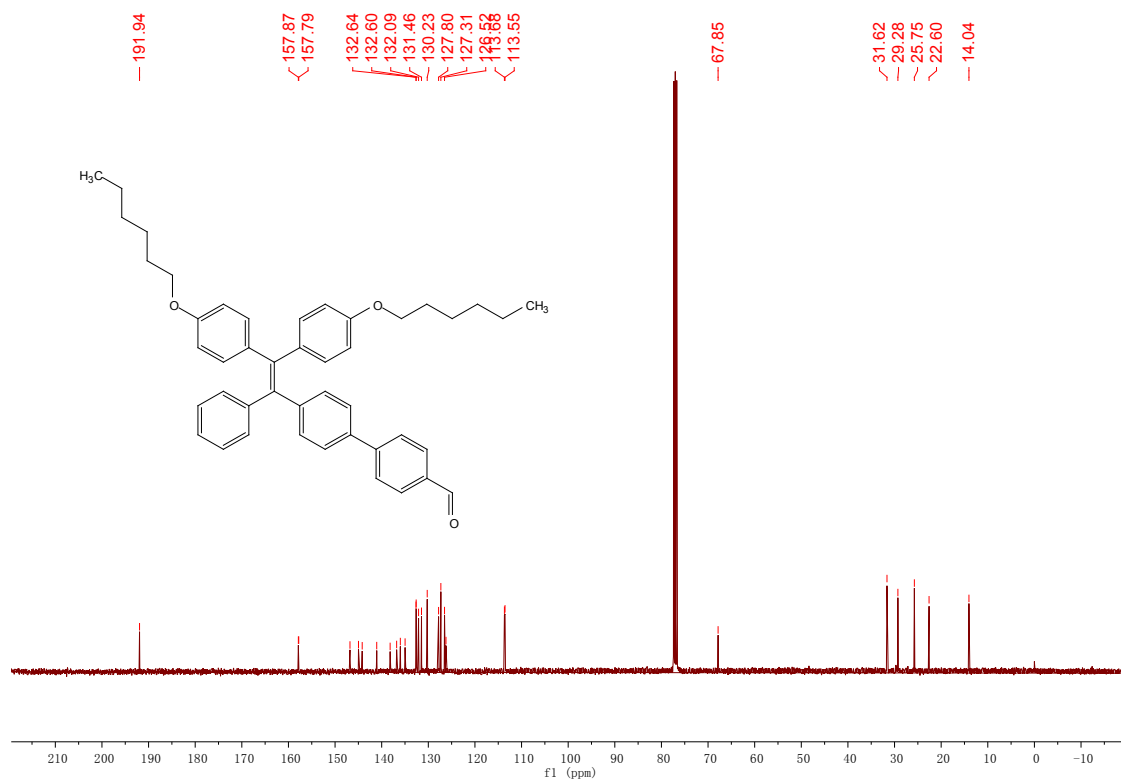

**Fig. S10.**  $^{13}\text{C-NMR}$  spectrum of TPE2

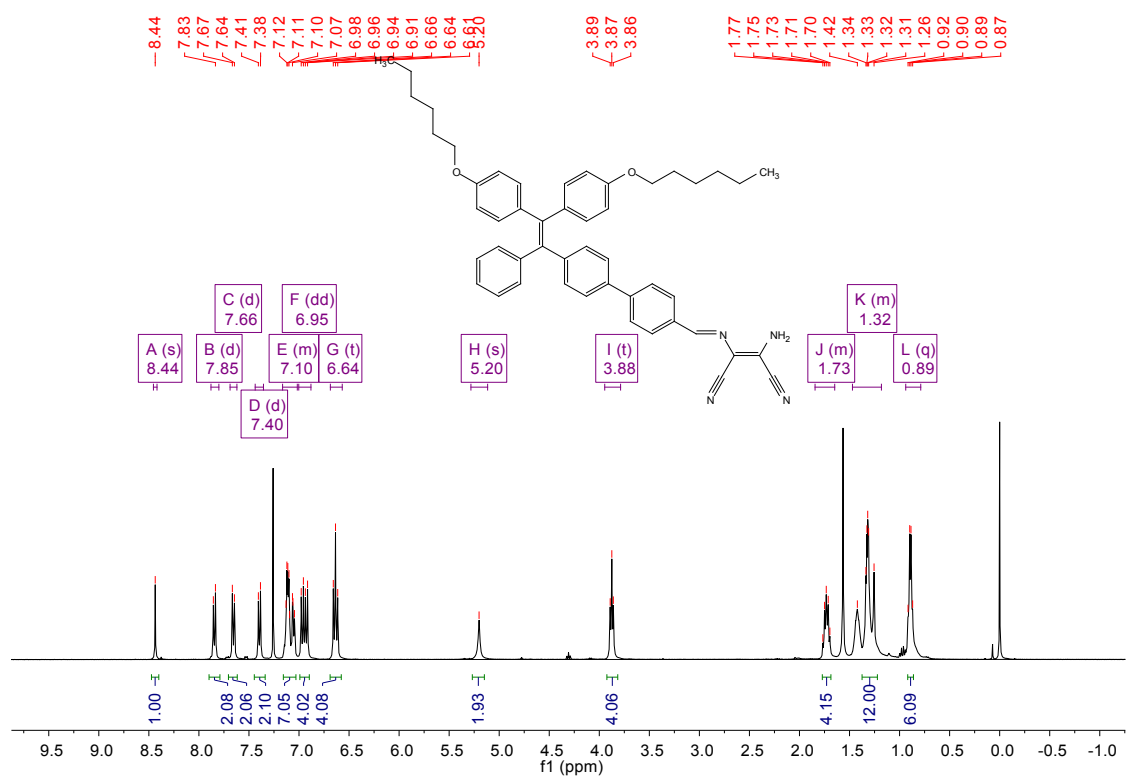

**Fig. S11.**  $^1\text{H-NMR}$  spectrum of S2

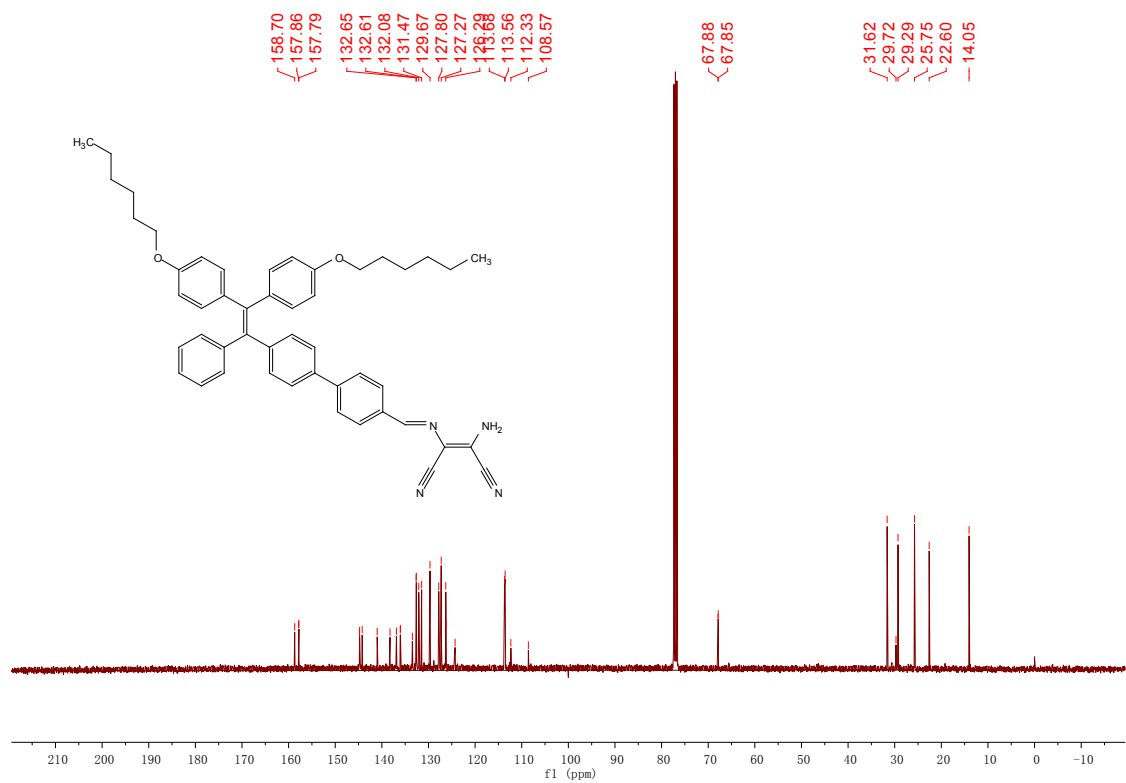

**Fig. S12.**  $^{13}\text{C-NMR}$  spectrum of S2



S1\_180620155819 #3 RT: 0.02 AV: 1 NL: 2.19E8  
T: FTMS + p APCI corona Full ms [250.0000-1050.0000]

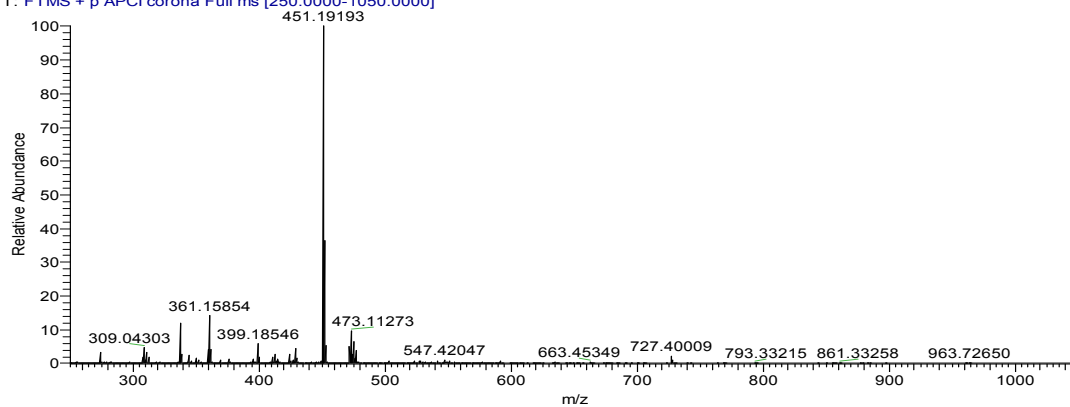

Fig. S13. HR-MS spectrum of S1

S2\_180620155653 #9 RT: 0.08 AV: 1 NL: 4.46E7  
T: FTMS + p APCI corona Full ms [250.0000-1050.0000]

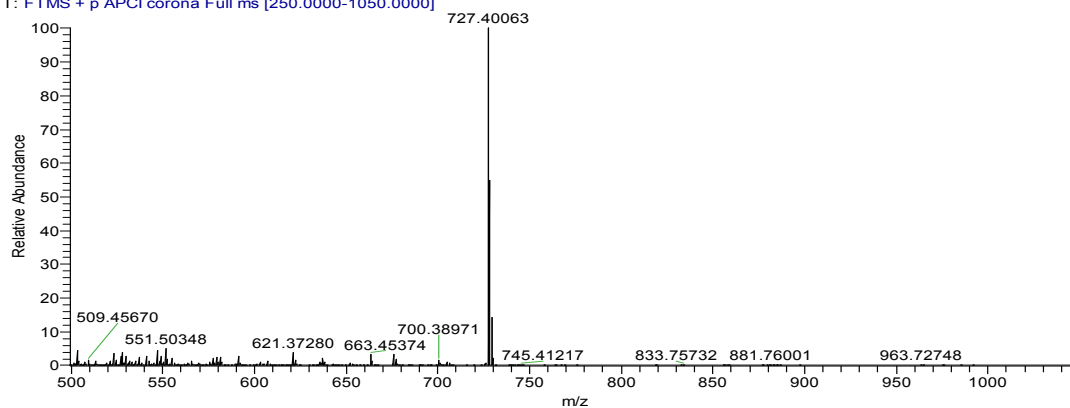

Fig. S14. HR-MS spectrum of S2

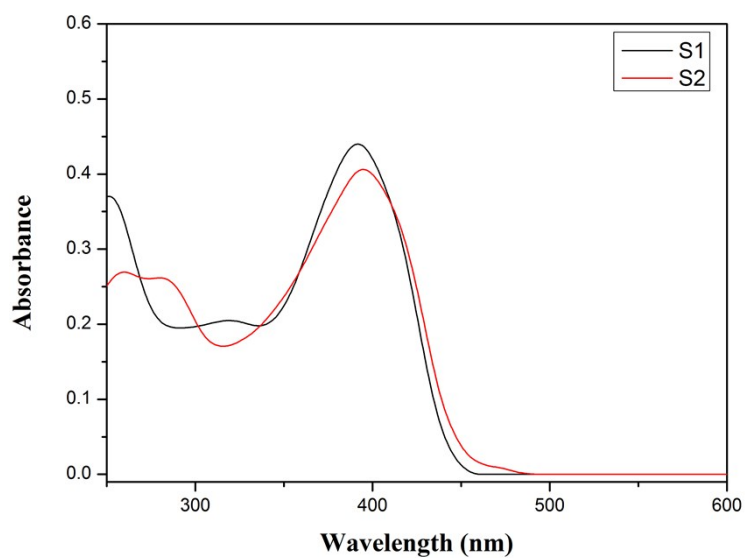

Fig. S15. UV-vis absorption of probe S1 and S2 in THF solution

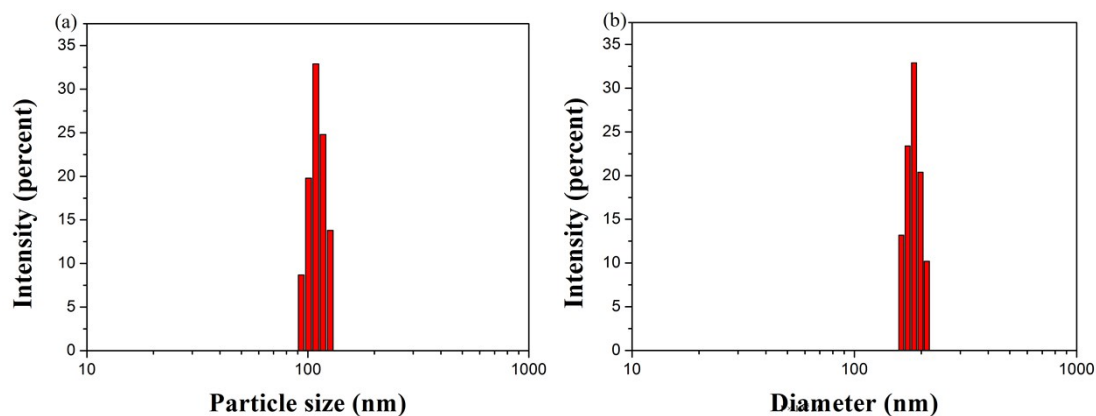

**Fig. S16.** Particle size of aggregates of (a) S1 ( $1 \times 10^{-5}$  M) and (b) S2 ( $1 \times 10^{-5}$  M) formed in THF aqueous solution ( $f_w = 99$  vol %).

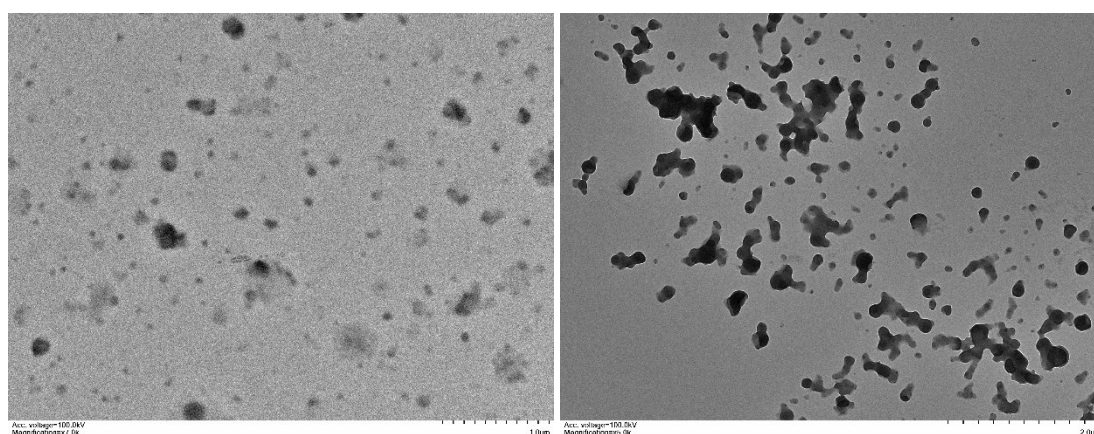

**Fig. S17.** TEM image of (a) S1 and (b) S2 particles.

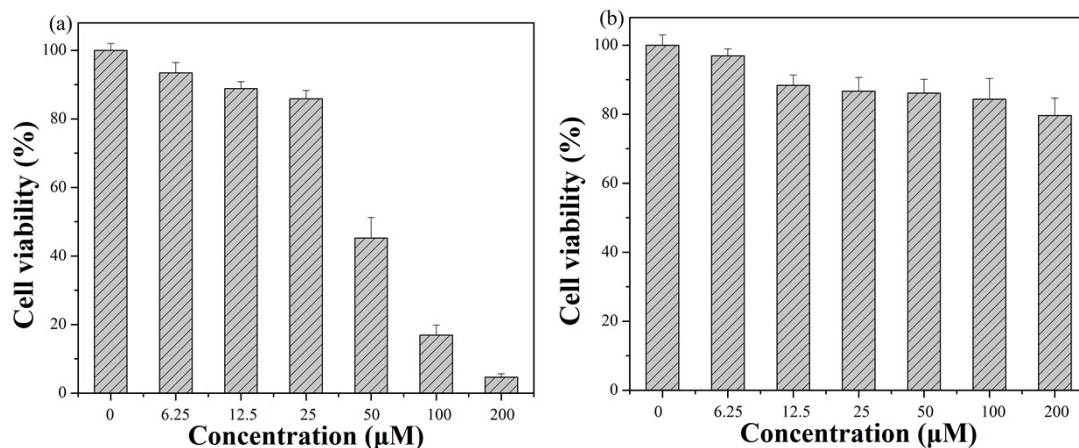

**Fig. S18.** Percentage of A-549 cell viability remaining after cell treatment with (a) S1 and (b) S2 (untreated cells were considered to have 100% survival). Cell viability was assayed by the MTT method (values: mean  $\pm$  standard deviation).
